# Supplementary material for: Kinematic Validation of a Multi-Kinect v2 Instrumented 10-Meter Walkway for Quantitative Gait Assessments
Source: PubMed Central journal article supplement (PMC4603795; doi:10.1371/journal.pone.0139913), 2015-10-13
Supplement: pone.0139913.s002.pdf [file pone.0139913.s002.pdf]

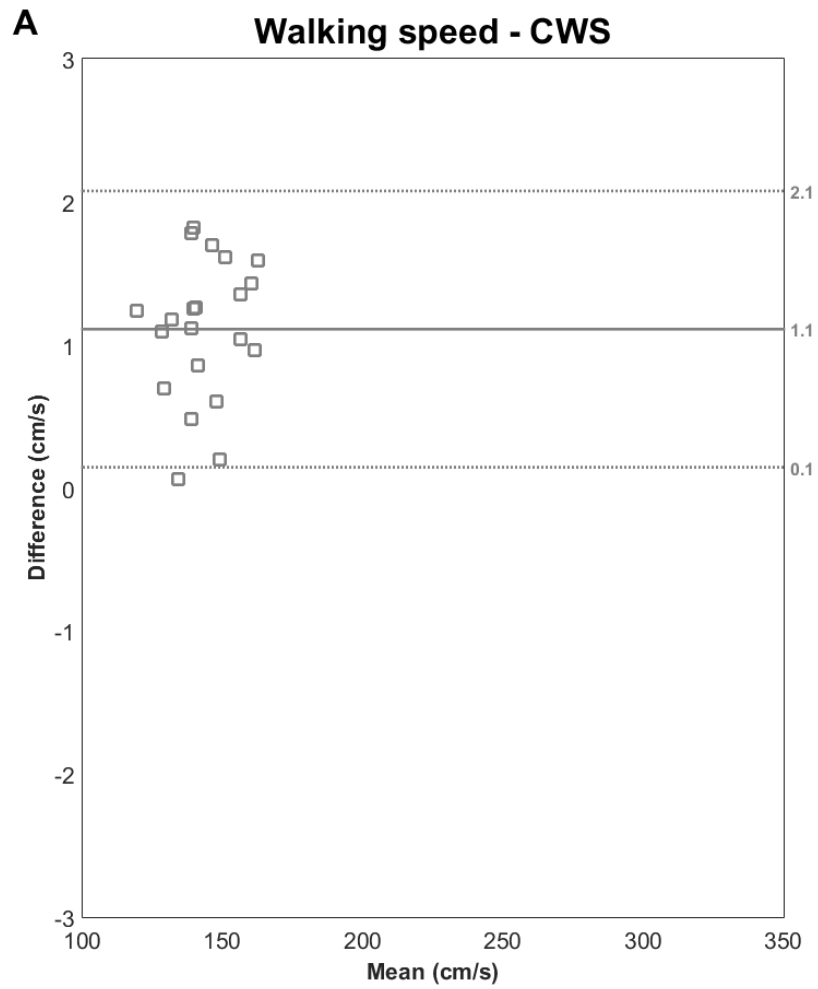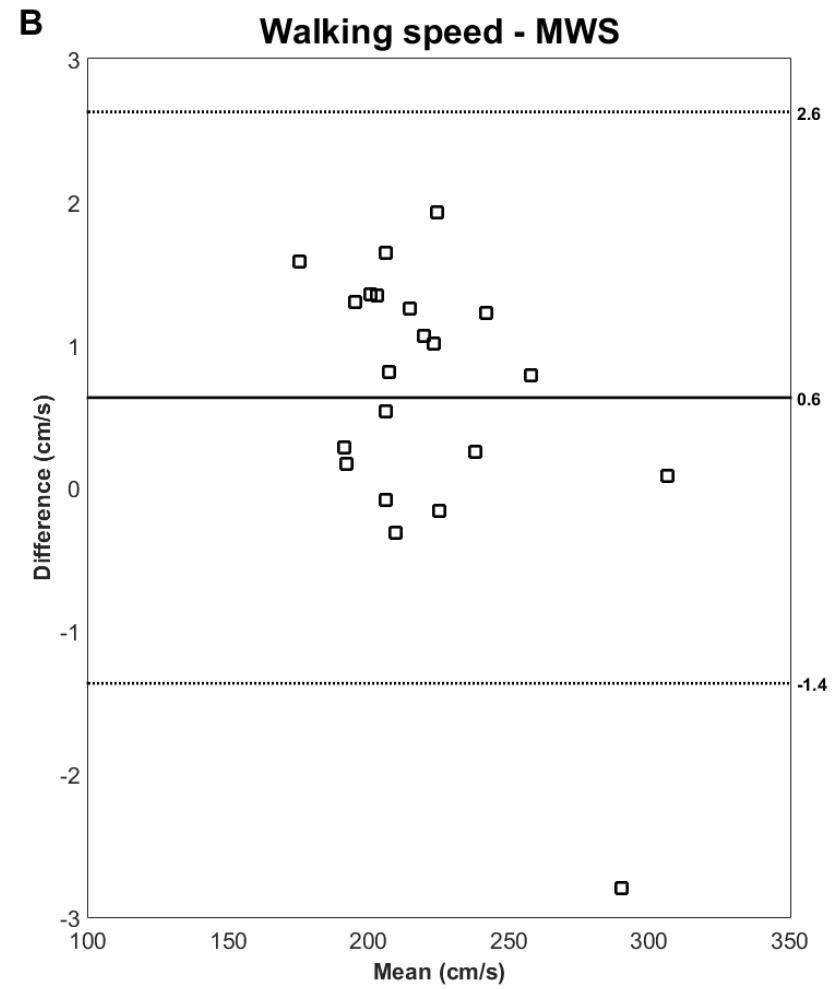

Figure 1: Bland-Altman plot for walking speed during the comfortable walking speed (CWS; A) and maximum walking speed (MWS; B) condition. Solid lines represent biases between the two motion registration systems. Dashed lines represent the 95% limits of agreement.

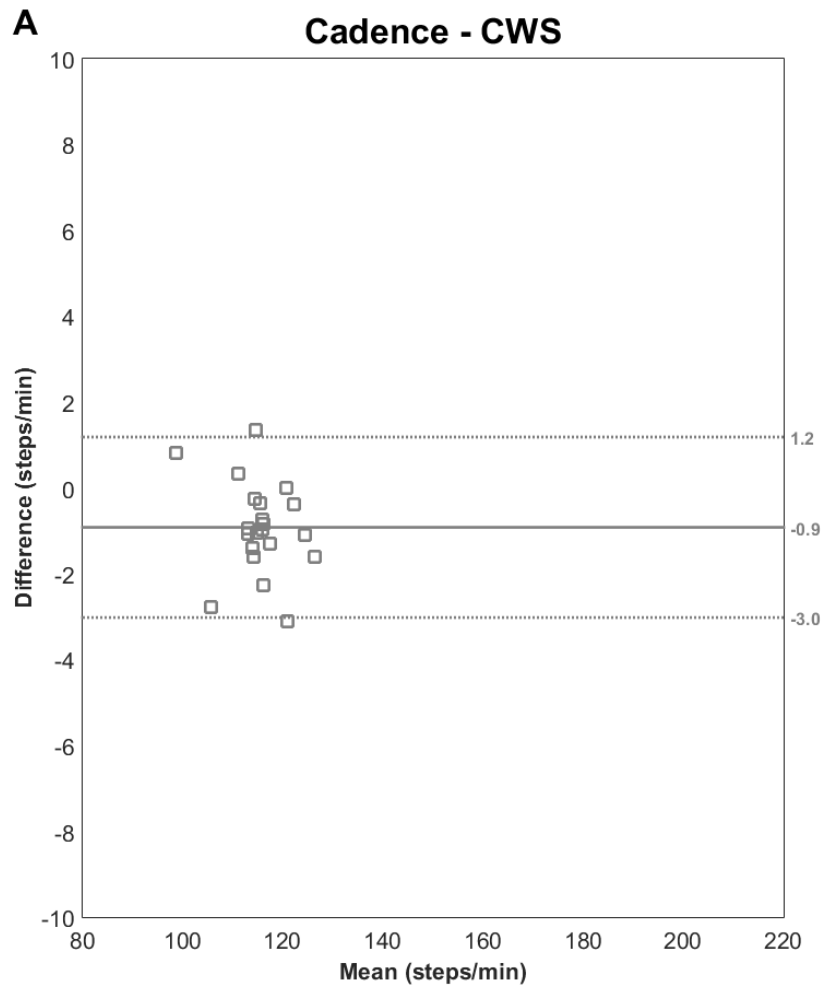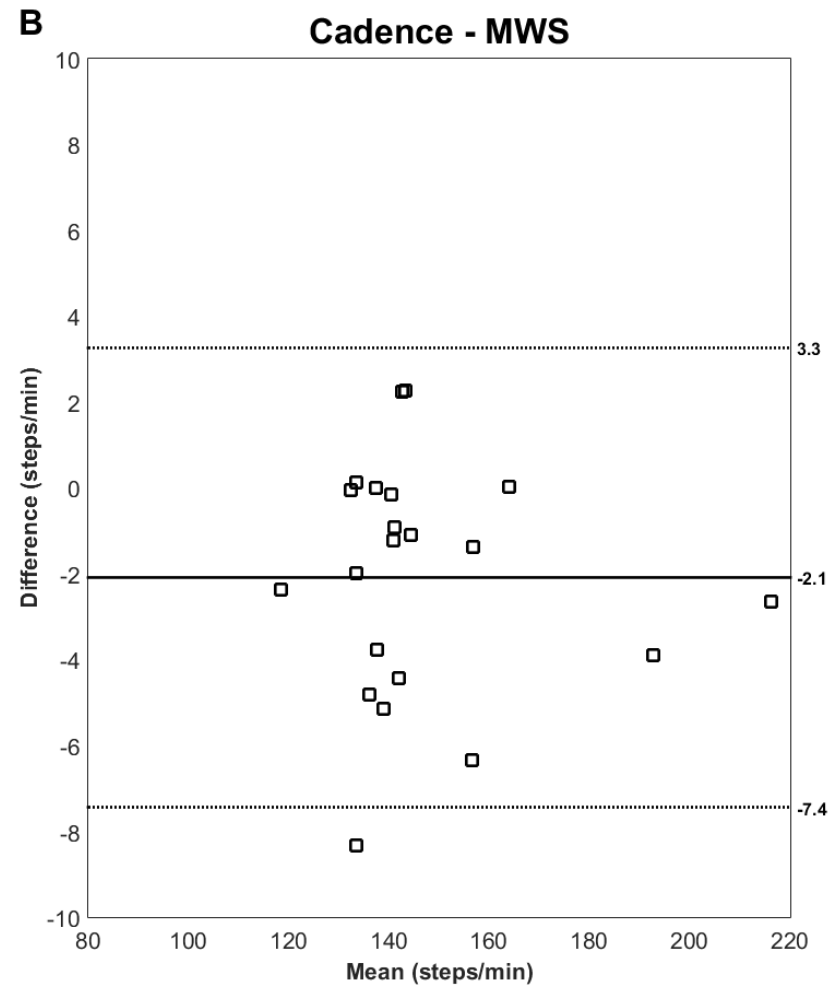

Figure 2: Bland-Altman plot for cadence during the comfortable walking speed (CWS; A) and maximum walking speed (MWS; B) condition. Solid lines represent biases between the two motion registration systems. Dashed lines represent the 95% limits of agreement.

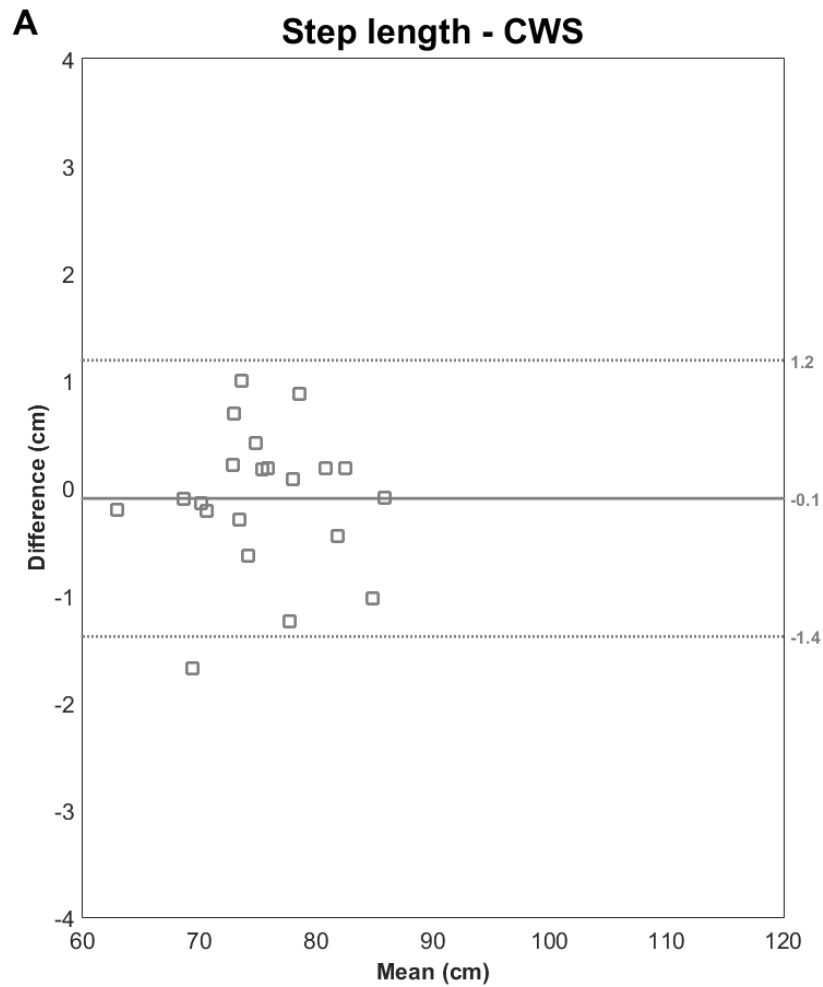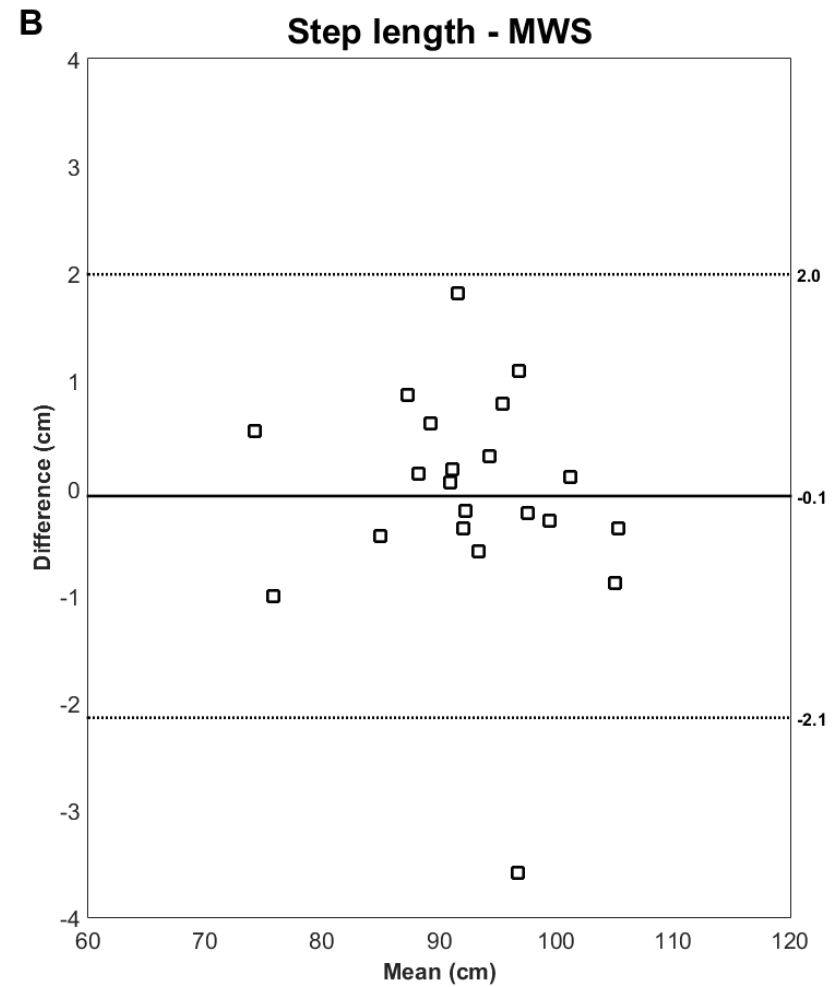

Figure 3: Bland-Altman plot for step length during the comfortable walking speed (CWS; A) and maximum walking speed (MWS; B) condition. Solid lines represent biases between the two motion registration systems. Dashed lines represent the 95% limits of agreement.

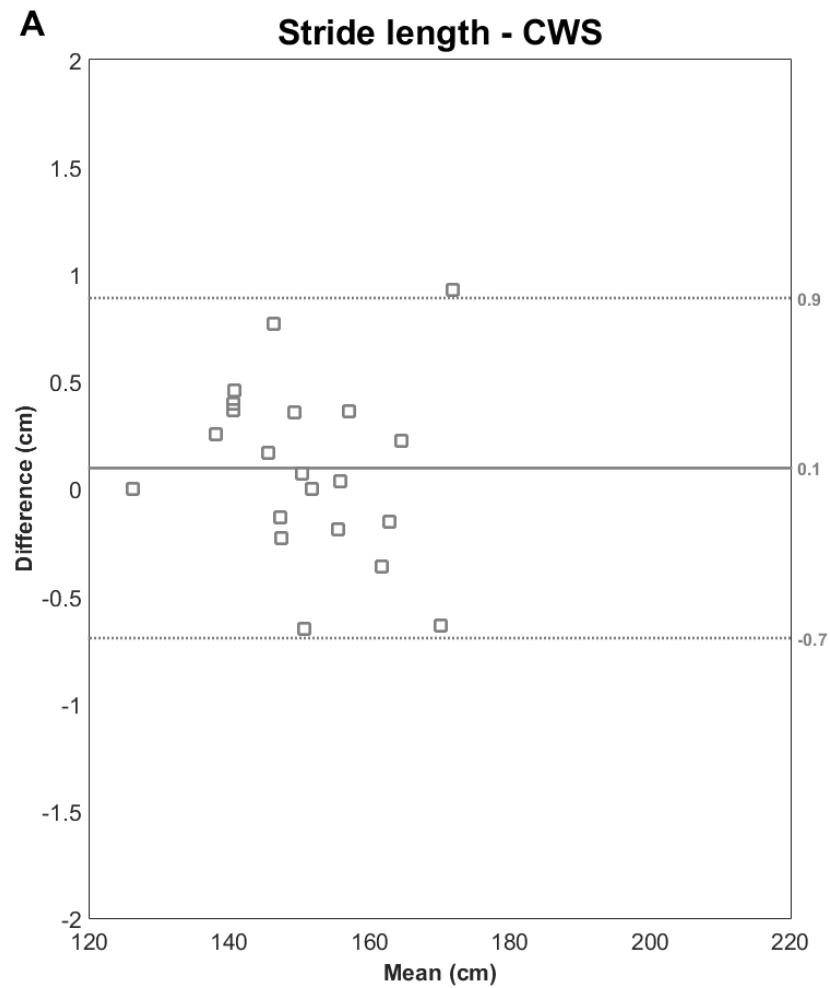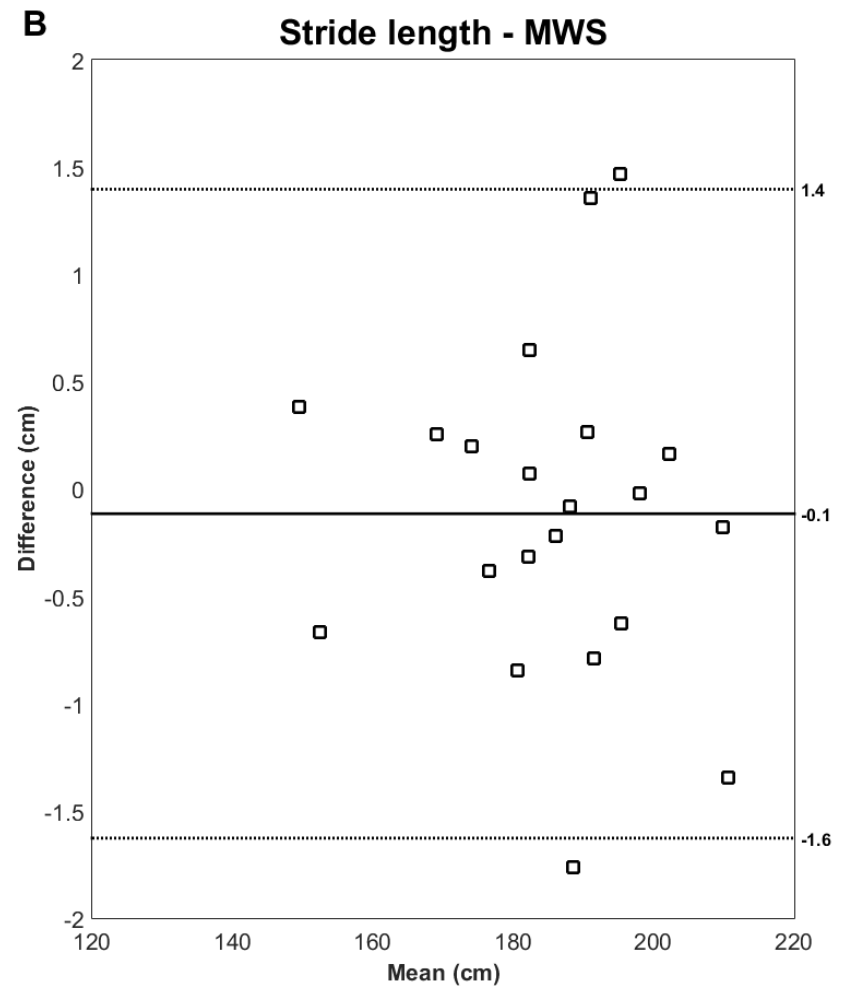

Figure 4: Bland-Altman plot for stride length during the comfortable walking speed (CWS; A) and maximum walking speed (MWS; B) condition. Solid lines represent biases between the two motion registration systems. Dashed lines represent the 95% limits of agreement.

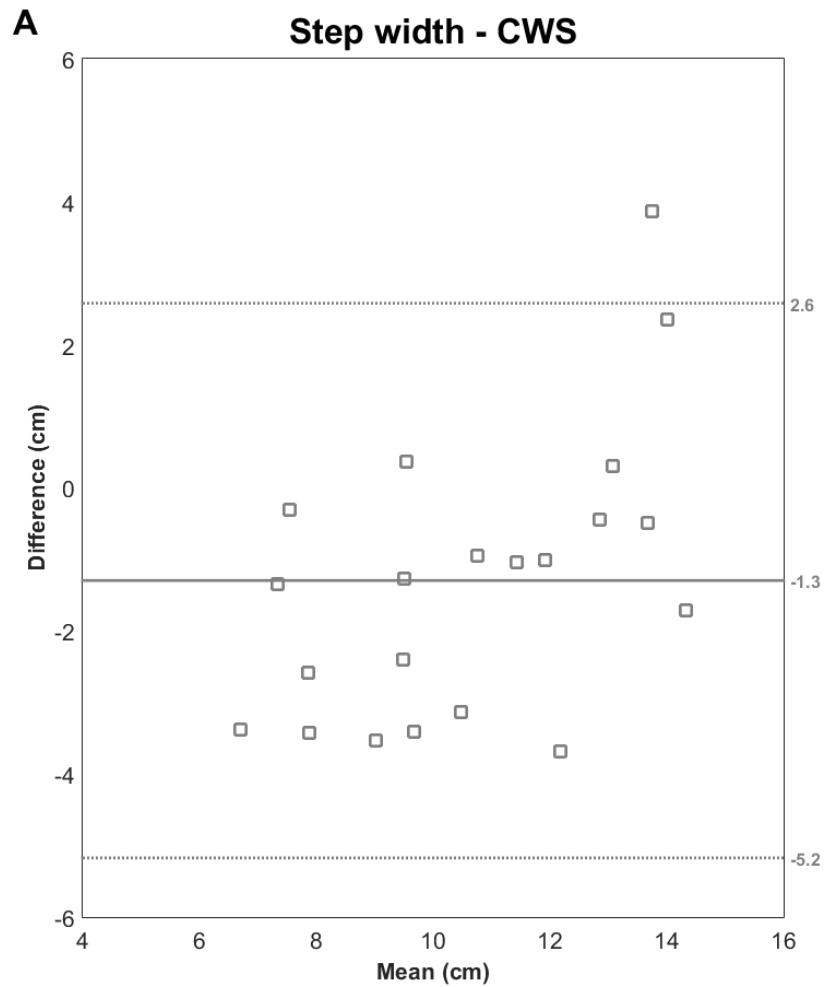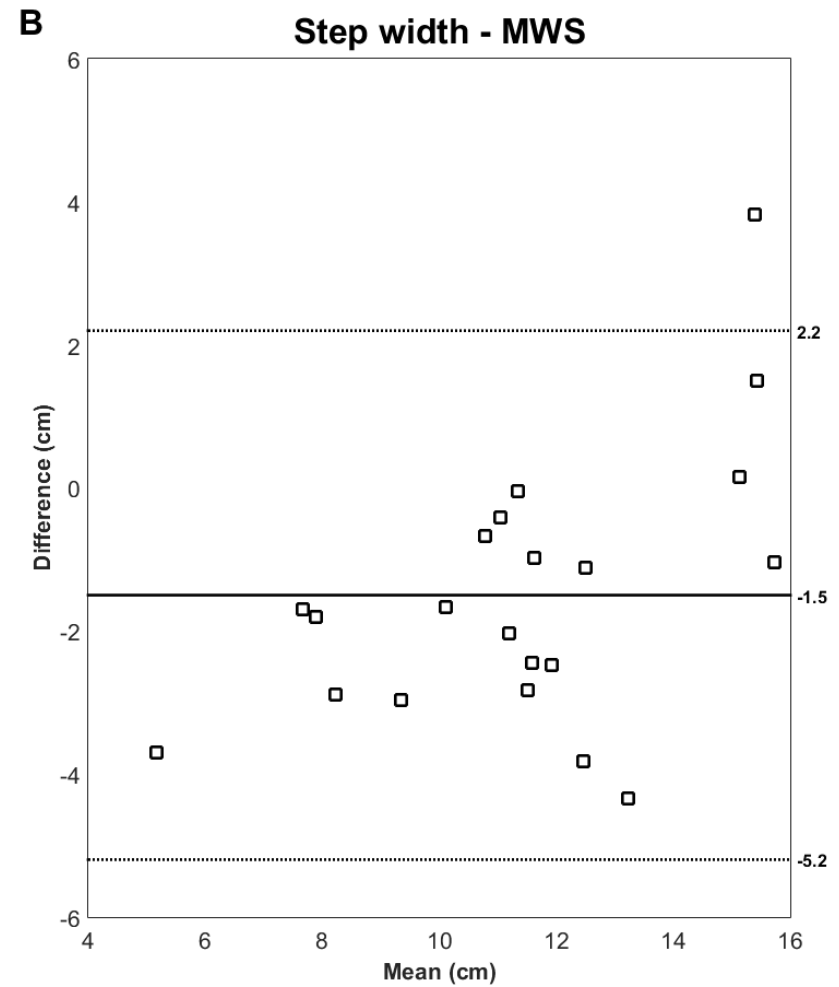

Figure 5: Bland-Altman plot for step width during the comfortable walking speed (CWS; A) and maximum walking speed (MWS; B) condition. Solid lines represent biases between the two motion registration systems. Dashed lines represent the 95% limits of agreement.

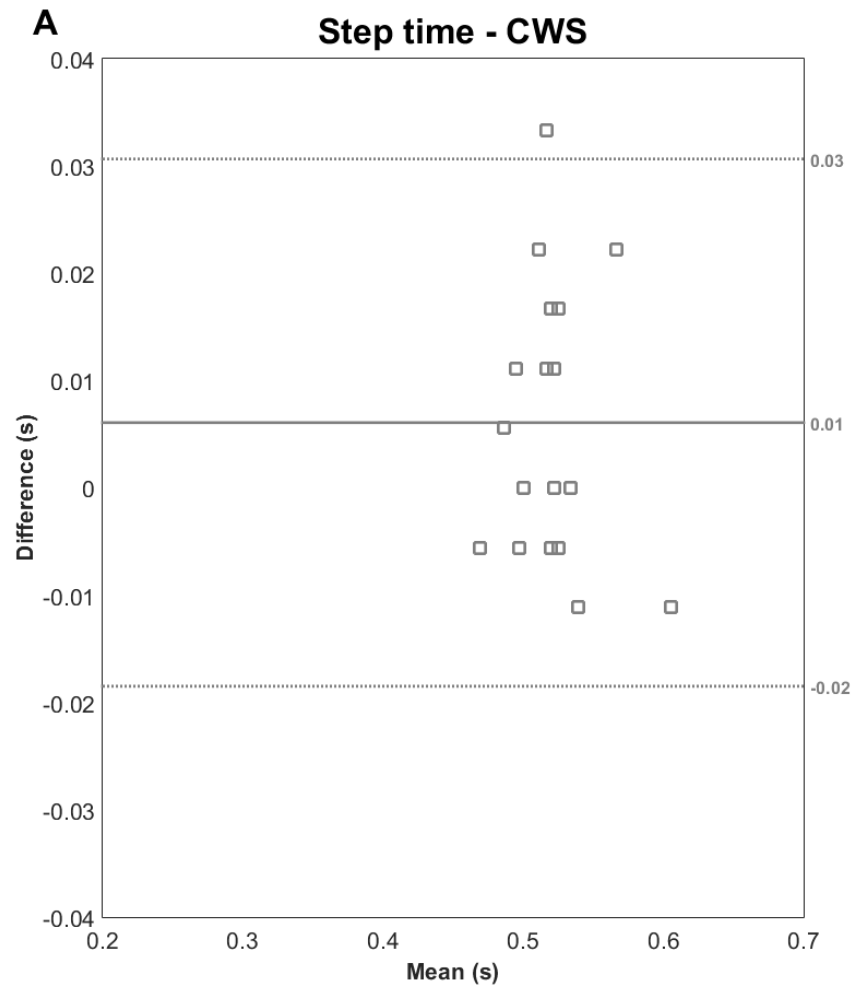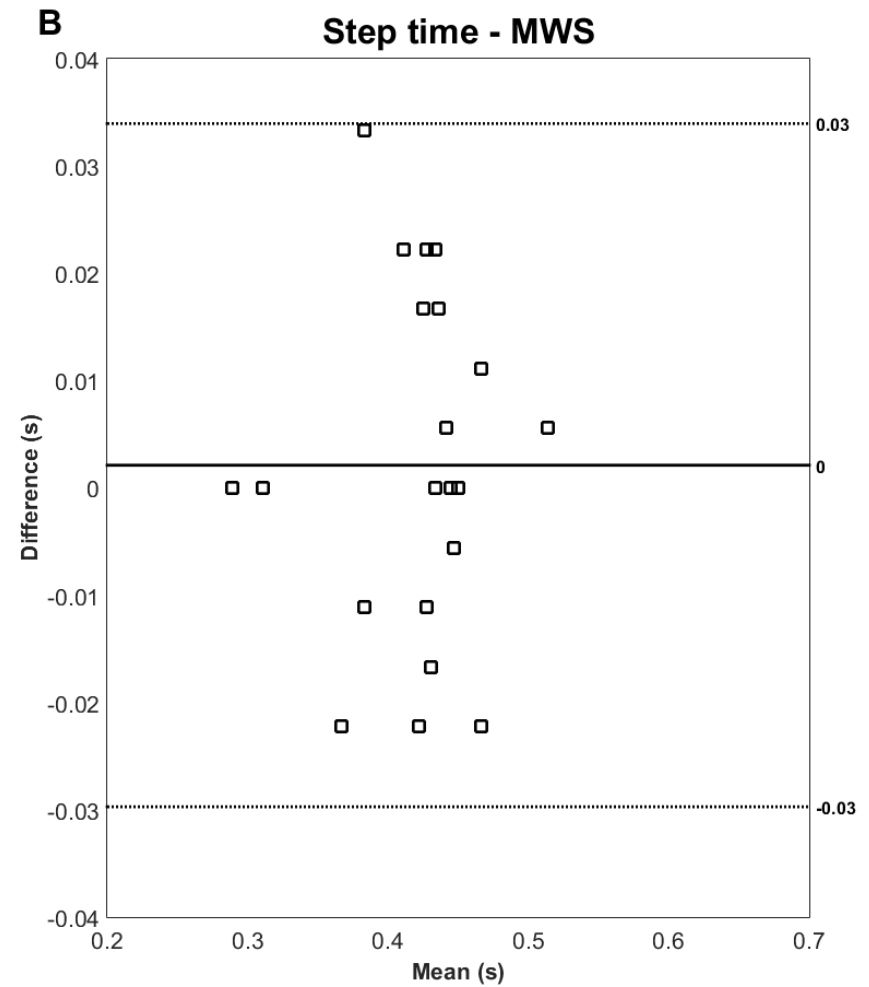

Figure 6: Bland-Altman plot for step time during the comfortable walking speed (CWS; A) and maximum walking speed (MWS; B) condition. Solid lines represent biases between the two motion registration systems. Dashed lines represent the 95% limits of agreement.

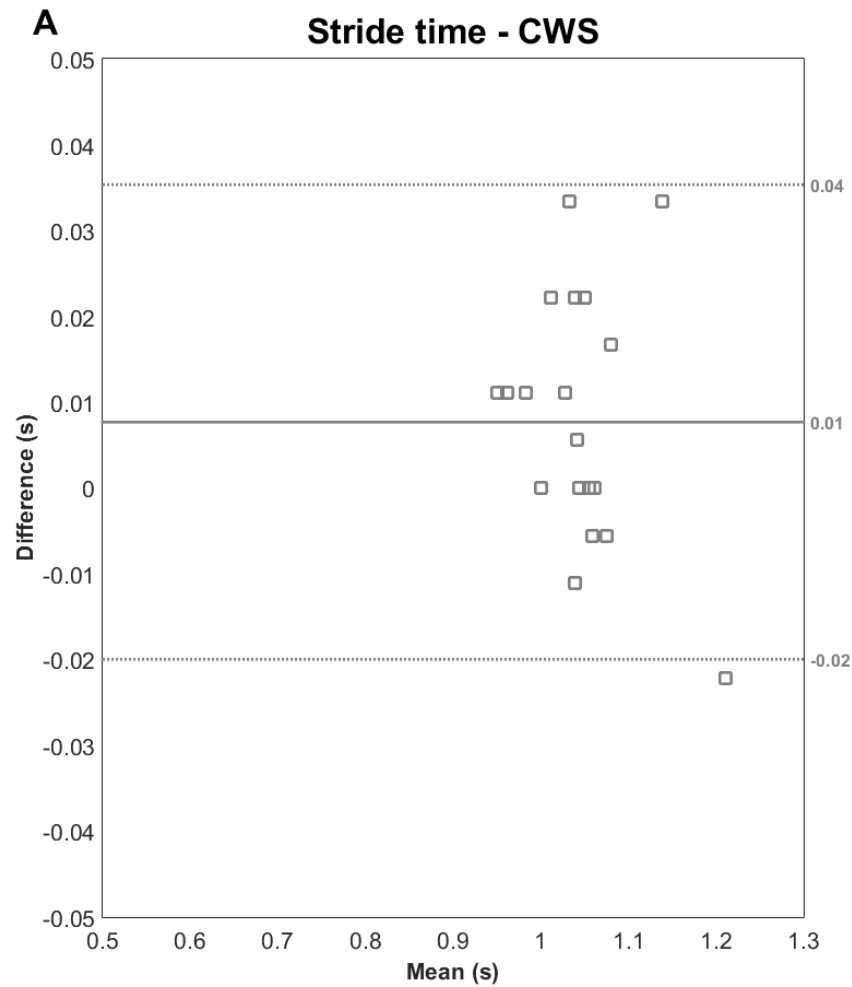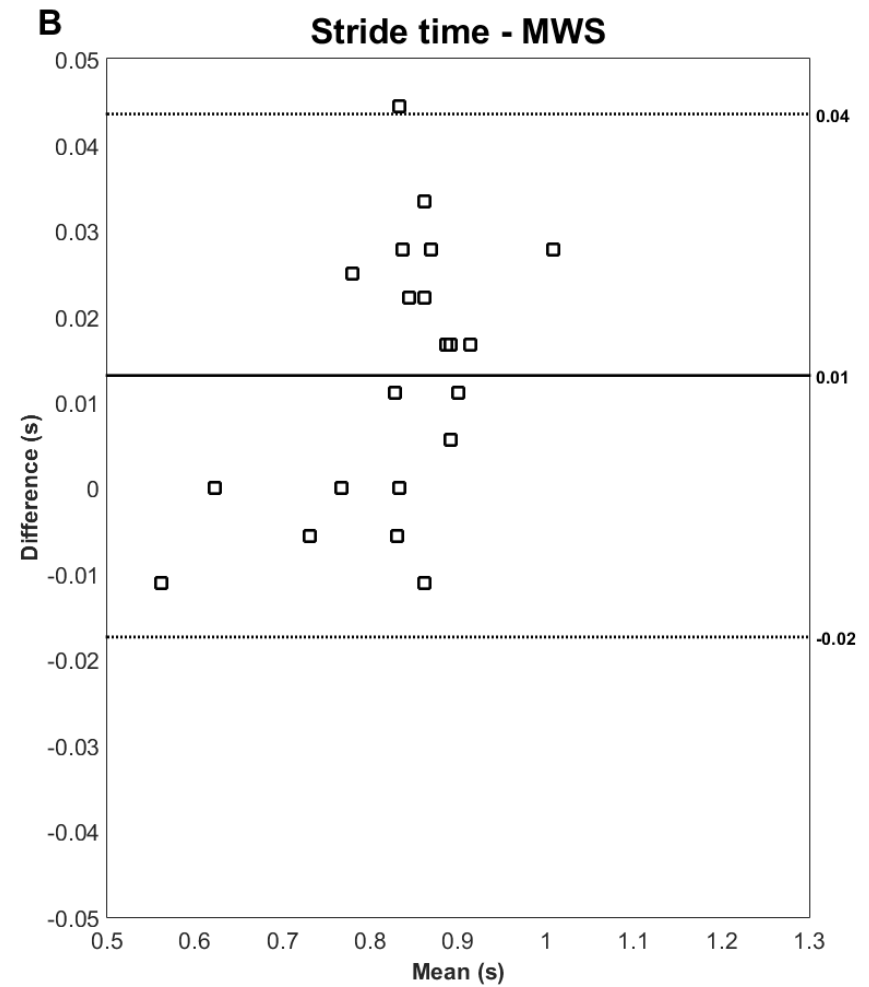

Figure 7: Bland-Altman plot for stride time during the comfortable walking speed (CWS; A) and maximum walking speed (MWS; B) condition. Solid lines represent biases between the two motion registration systems. Dashed lines represent the 95% limits of agreement.
