# Supplementary material for: Kinematic Validation of a Multi-Kinect v2 Instrumented 10-Meter Walkway for Quantitative Gait Assessments
Source: PubMed Central journal article supplement (PMC4603795; doi:10.1371/journal.pone.0139913), 2015-10-13
Supplement: pone.0139913.s003.pdf [file pone.0139913.s003.pdf]

Overview of Kinect and Optotrak body points. For the latter, AP, ML and V position time series were computed from virtual markers and/or smart markers. In case of a single virtual marker or smart marker, the time series of that specific marker were taken as the time series of the associated body point. In case of multiple virtual markers and/or smart markers, the associated marker positions were averaged in all three directions for each time sample.

| <b>Kinect body point</b> | <b>Smart Marker Rigid Body position</b> | <b>Virtual marker position</b>                                      | <b>Smart marker position</b>             |
|--------------------------|-----------------------------------------|---------------------------------------------------------------------|------------------------------------------|
| <b>Head</b>              | Head                                    | Nasion, inion and right and left ear                                | -                                        |
| <b>Neck</b>              | -                                       | -                                                                   | -                                        |
| <b>Spine shoulder</b>    | -                                       | -                                                                   | Sternum                                  |
| <b>Spine mid</b>         | -                                       | -                                                                   | -                                        |
| <b>Spine base</b>        | Lower abdomen                           | Right and left anterior superior and posterior superior iliac spine | -                                        |
| <b>Shoulders</b>         | Upper arms                              | Head of the humerus                                                 | -                                        |
| <b>Elbows</b>            | Upper arms                              | Medial and lateral epicondyles                                      | -                                        |
| <b>Wrists</b>            | Forearms                                | Distal heads of the radius and ulna                                 | -                                        |
| <b>Hands</b>             | -                                       | -                                                                   | Back of the hand                         |
| <b>Hand tips</b>         | -                                       | -                                                                   | -                                        |
| <b>Thumbs</b>            | -                                       | -                                                                   | -                                        |
| <b>Hips</b>              | Upper legs                              | Trochanter major                                                    | -                                        |
| <b>Knees</b>             | Upper legs                              | Medial and lateral condyles                                         | -                                        |
| <b>Ankles</b>            | Lower legs                              | Medial and lateral malleoli                                         | -                                        |
| <b>Feet</b>              | Feet                                    | Calcaneus                                                           | Head of the distal phalanx of the hallux |
